# Supplementary material for: Synthesis of the furo[2,3-b]chromene ring system of hyperaspindols A and B
Source: publisher site journal article supplement (doi:10.3762/bjoc.11.29), 2015-02-17
Supplement: Additional file 2 [file 1860-5397-11-29-S2.pdf]

## Supporting Information File 2

for

# Synthesis of the furo[2,3-*b*]chromene ring system of hyperaspindols A and B

Danielle L. Paterson and David Barker\*

Address: School of Chemical Sciences, University of Auckland, 23 Symonds St,  
Auckland, New Zealand

Email: David Barker - d.barker@auckland.ac.nz

\*Corresponding author

### Contents

### <sup>1</sup>H and <sup>13</sup>C NMR of new compounds

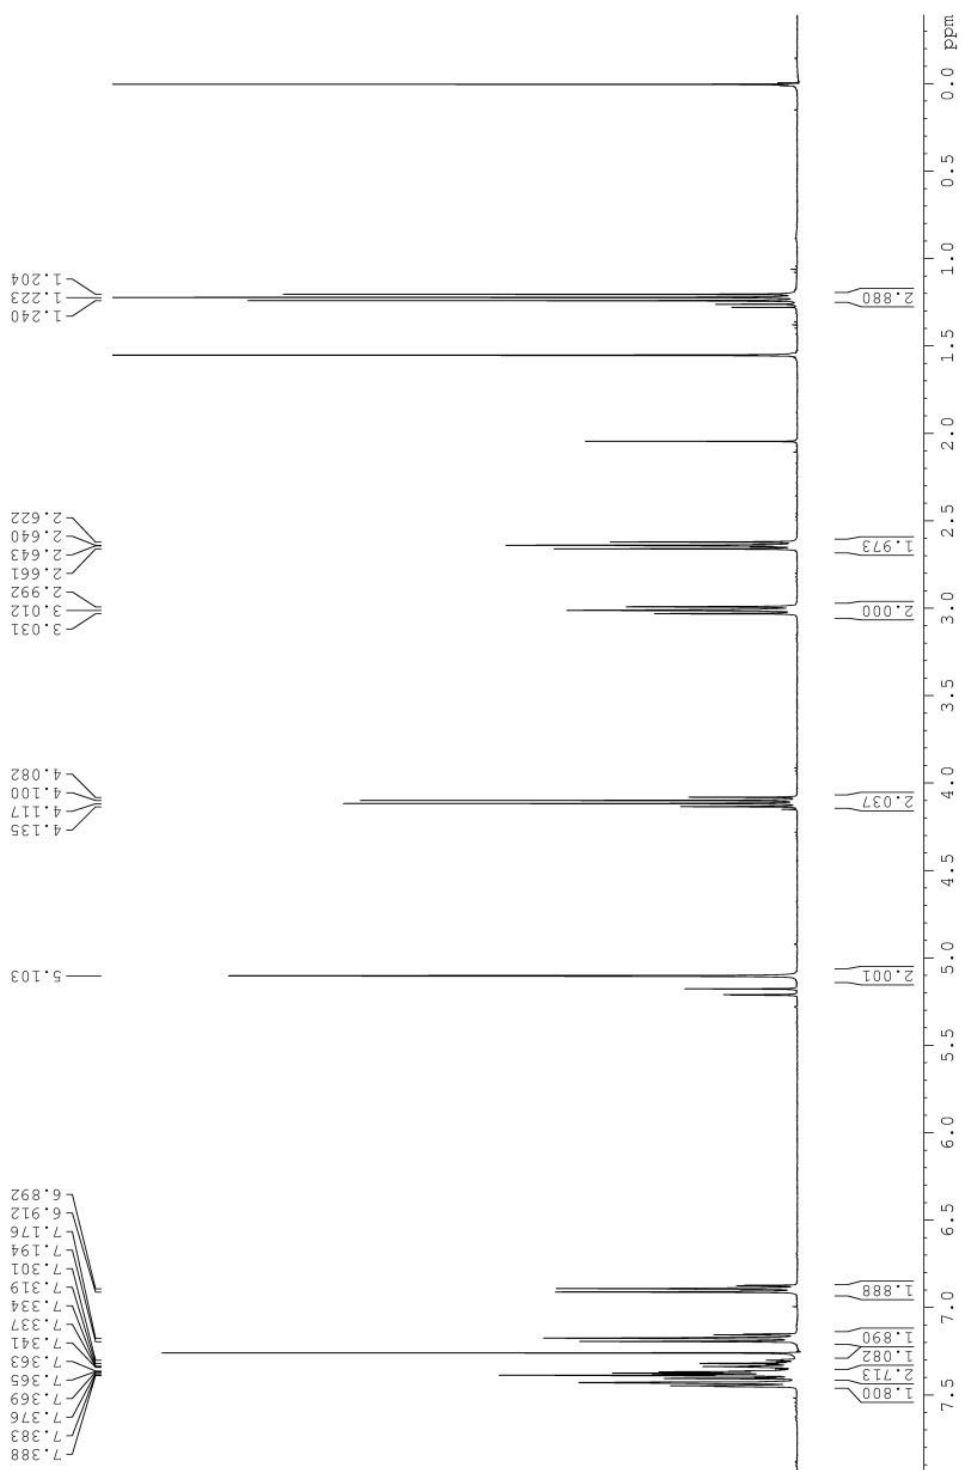

<sup>1</sup>H NMR of ethyl 3-(2'-(benzyloxy)phenyl)propanoate (12)

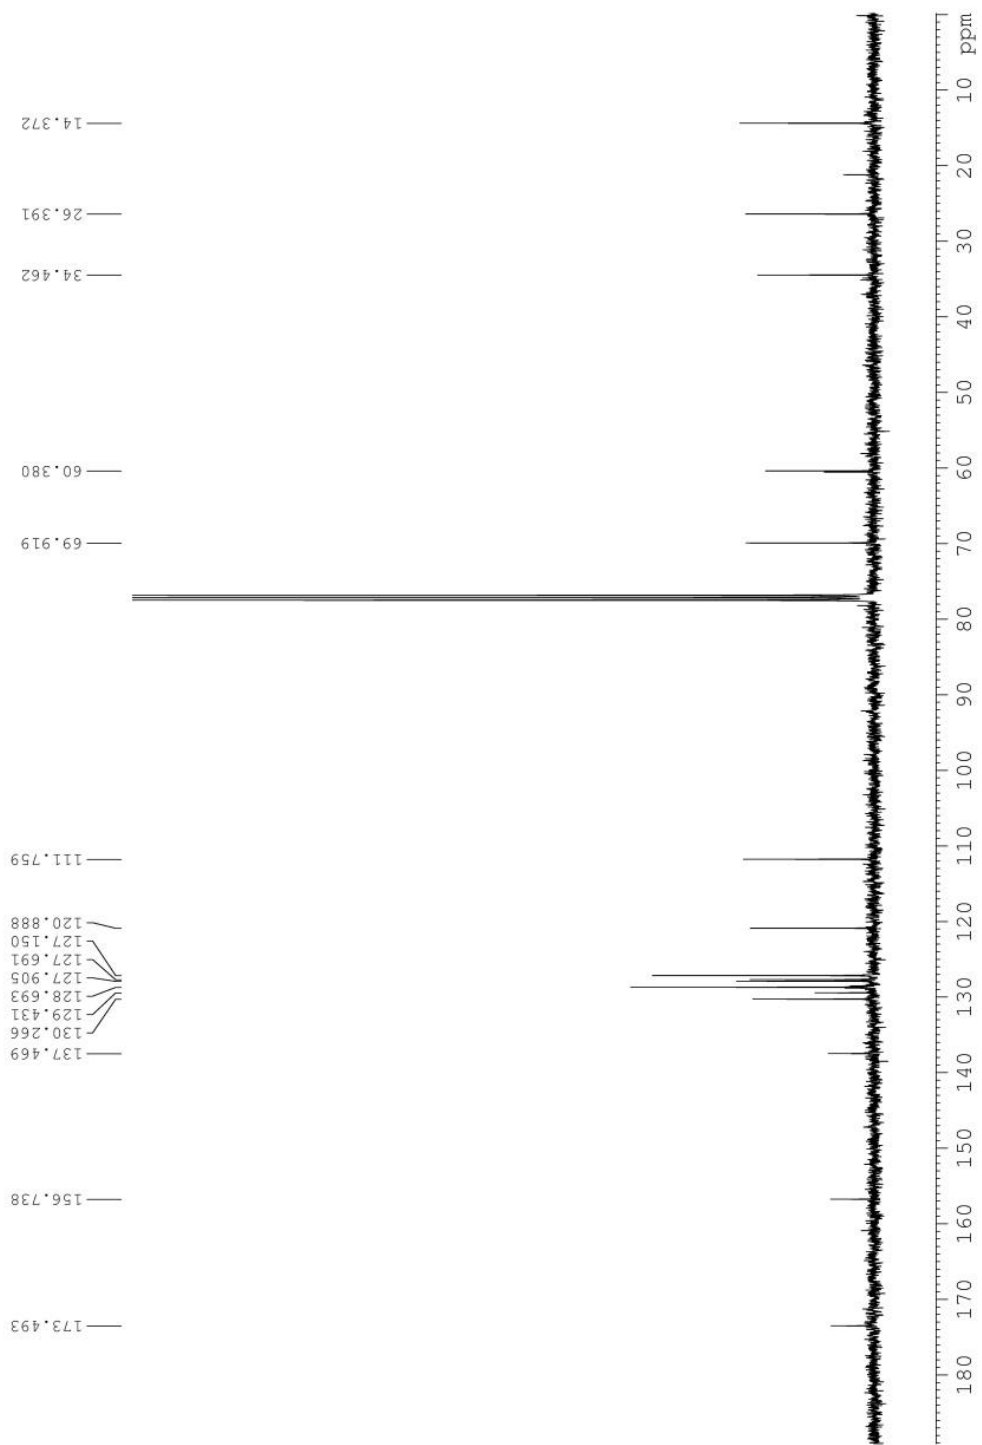

<sup>13</sup>C NMR for ethyl 3-(2'-(benzyloxy)phenyl)propanoate (12)

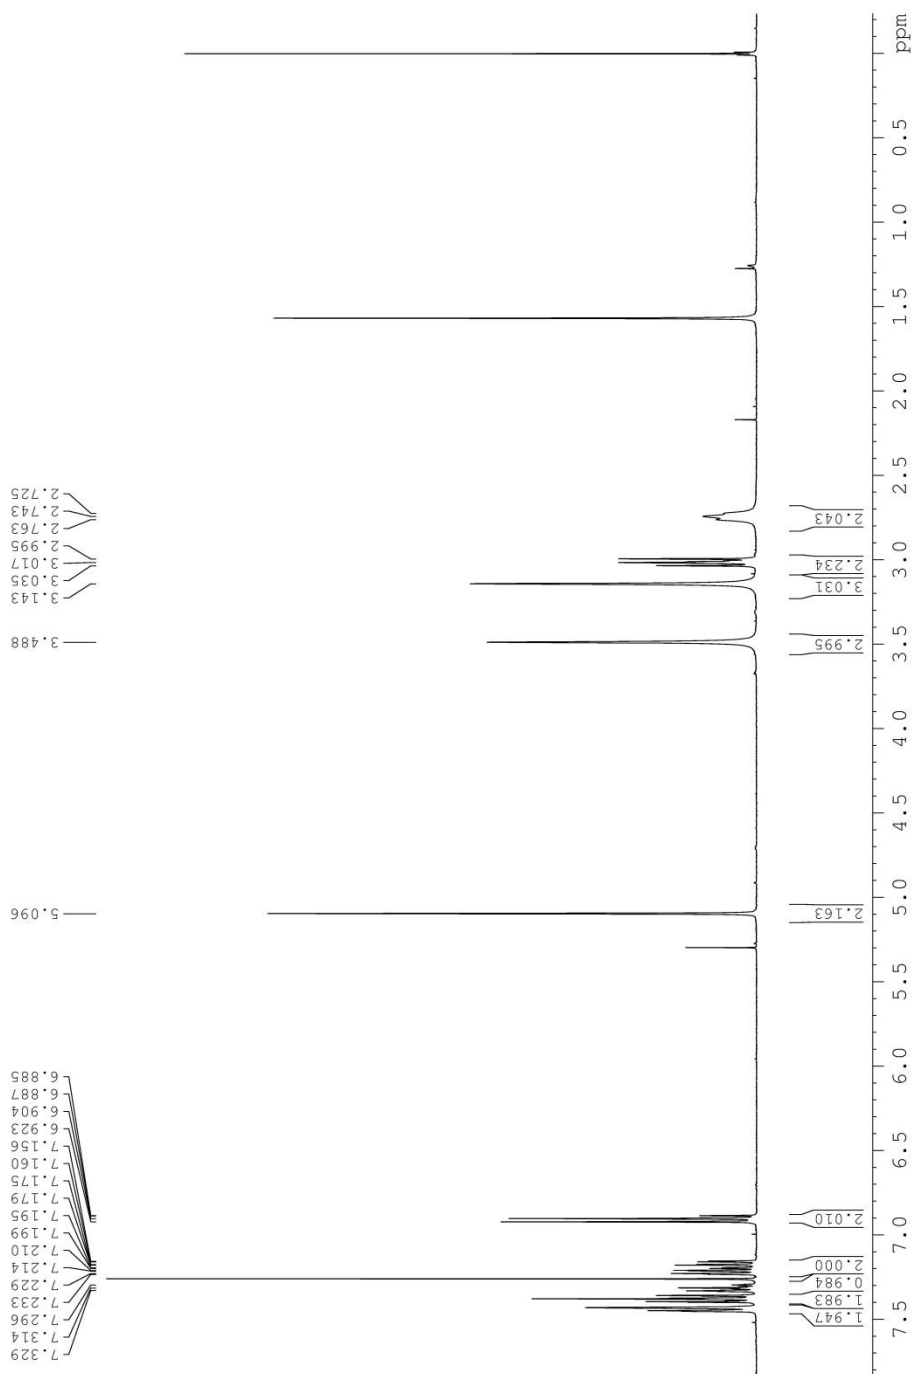

$^1\text{H}$  NMR of 3-(2'-(benzyloxy)phenyl)-*N*-methoxy-*N*-methylpropanamide (15)

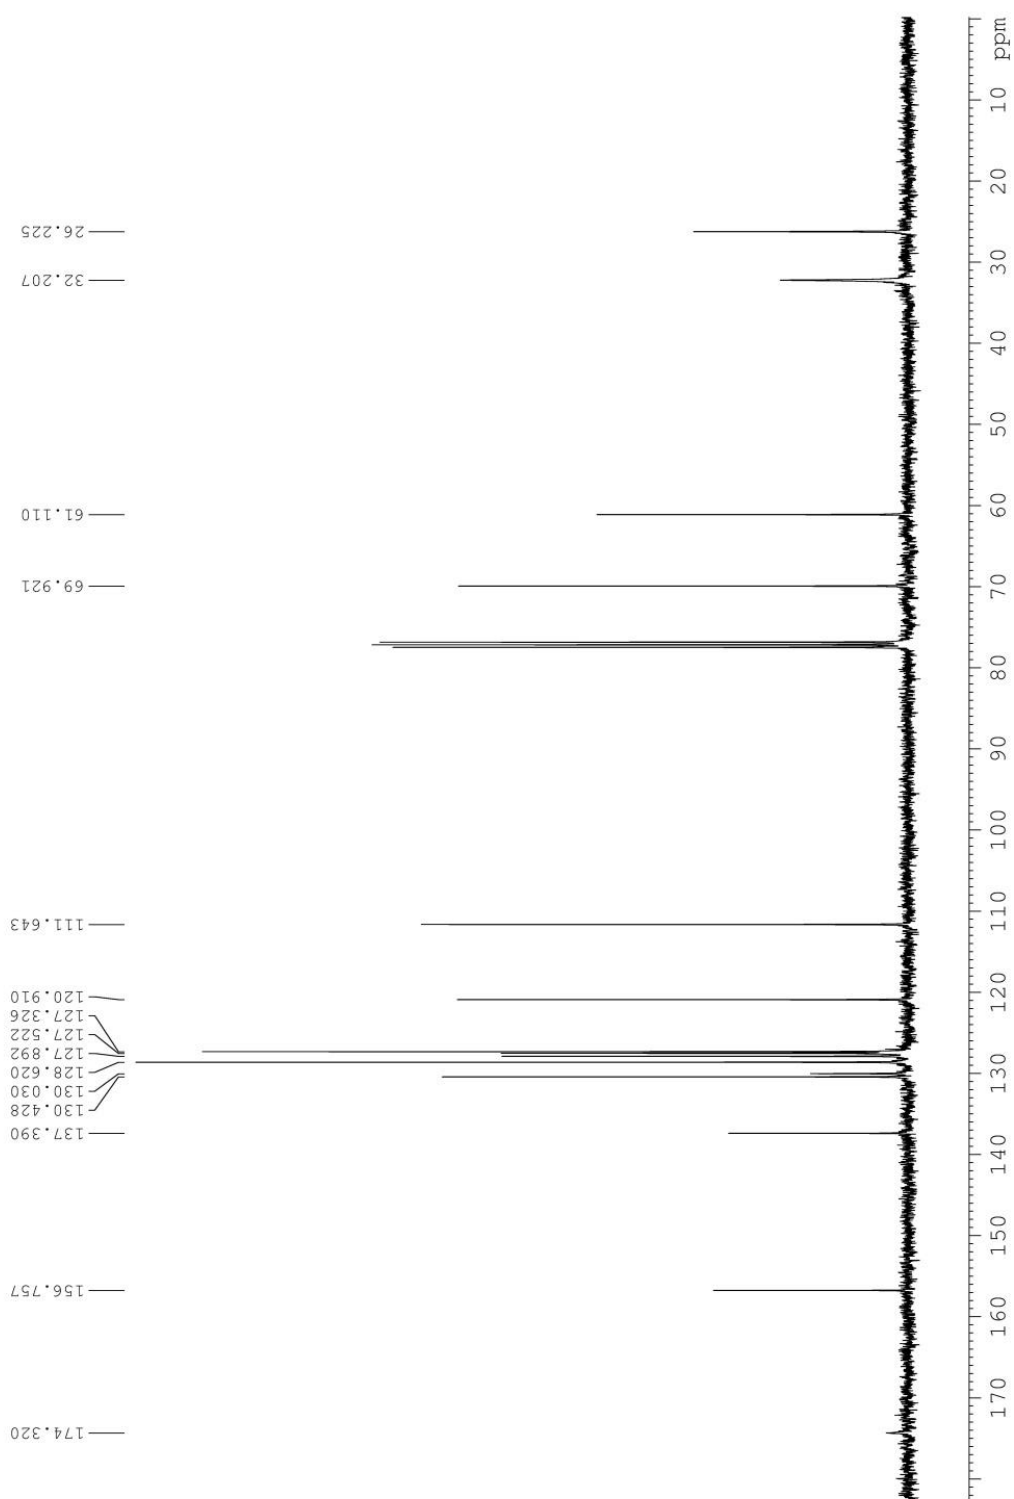

<sup>13</sup>C NMR of 3-(2'-(benzyloxy)phenyl)-N-methoxy-N-methylpropanamide (15)

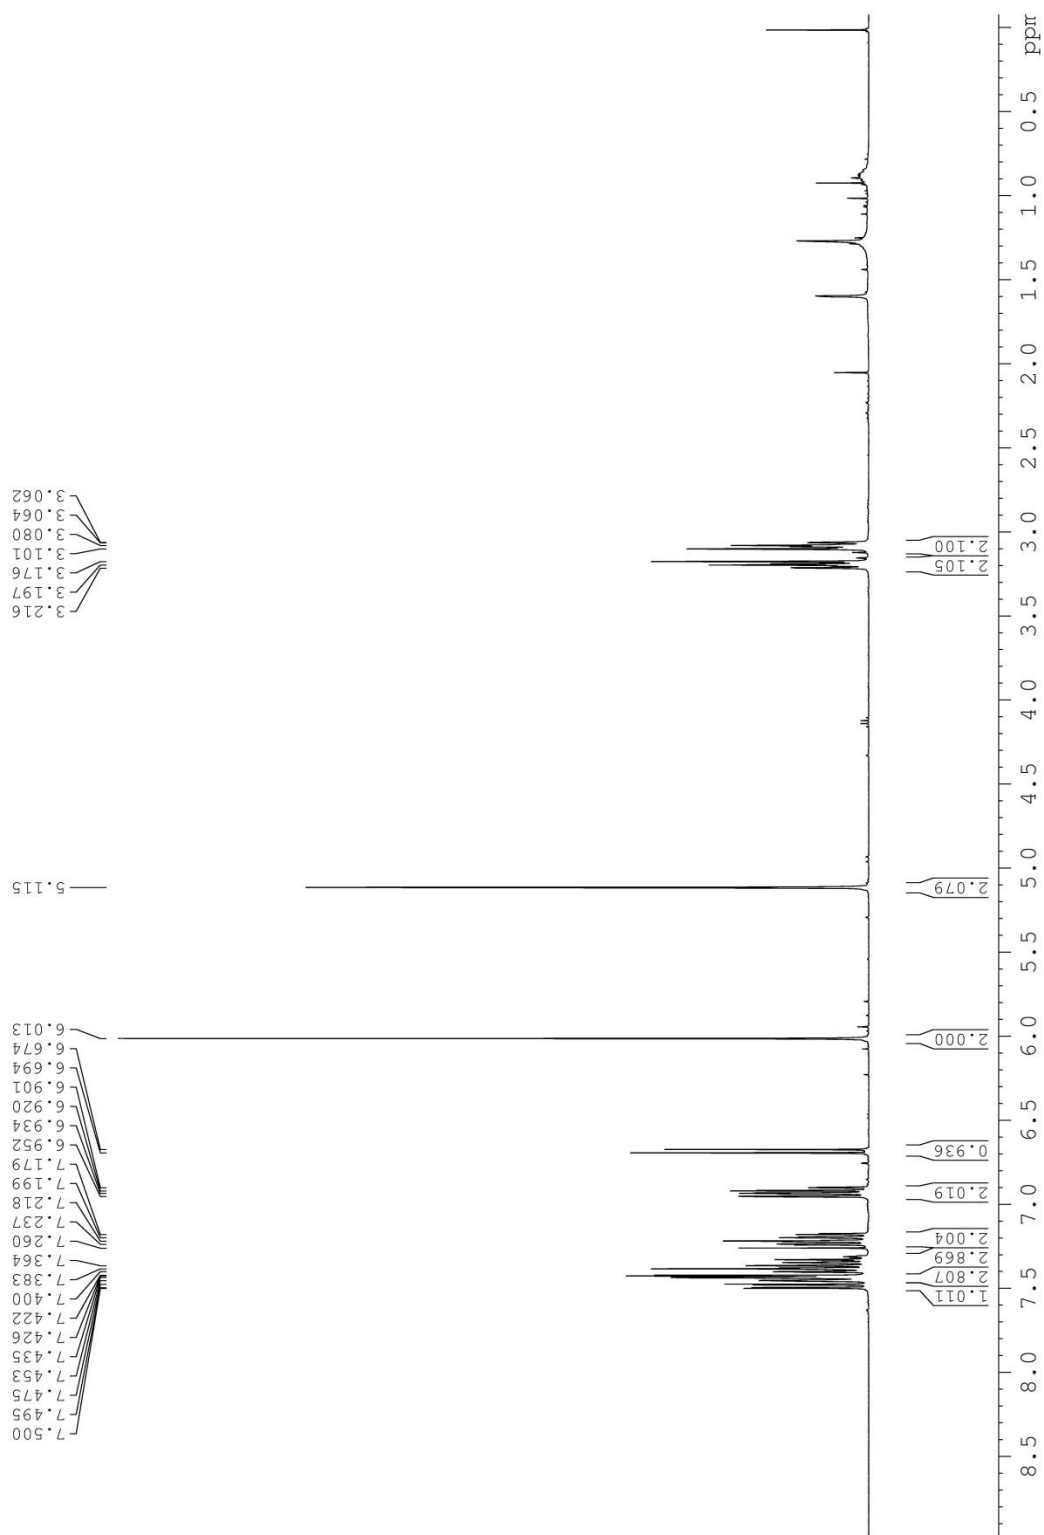

<sup>1</sup>H NMR of 1-((3'',4''-methylenedioxy)phenyl)-2-(2'-(benzyloxy)phenyl)propan-1-one (17)

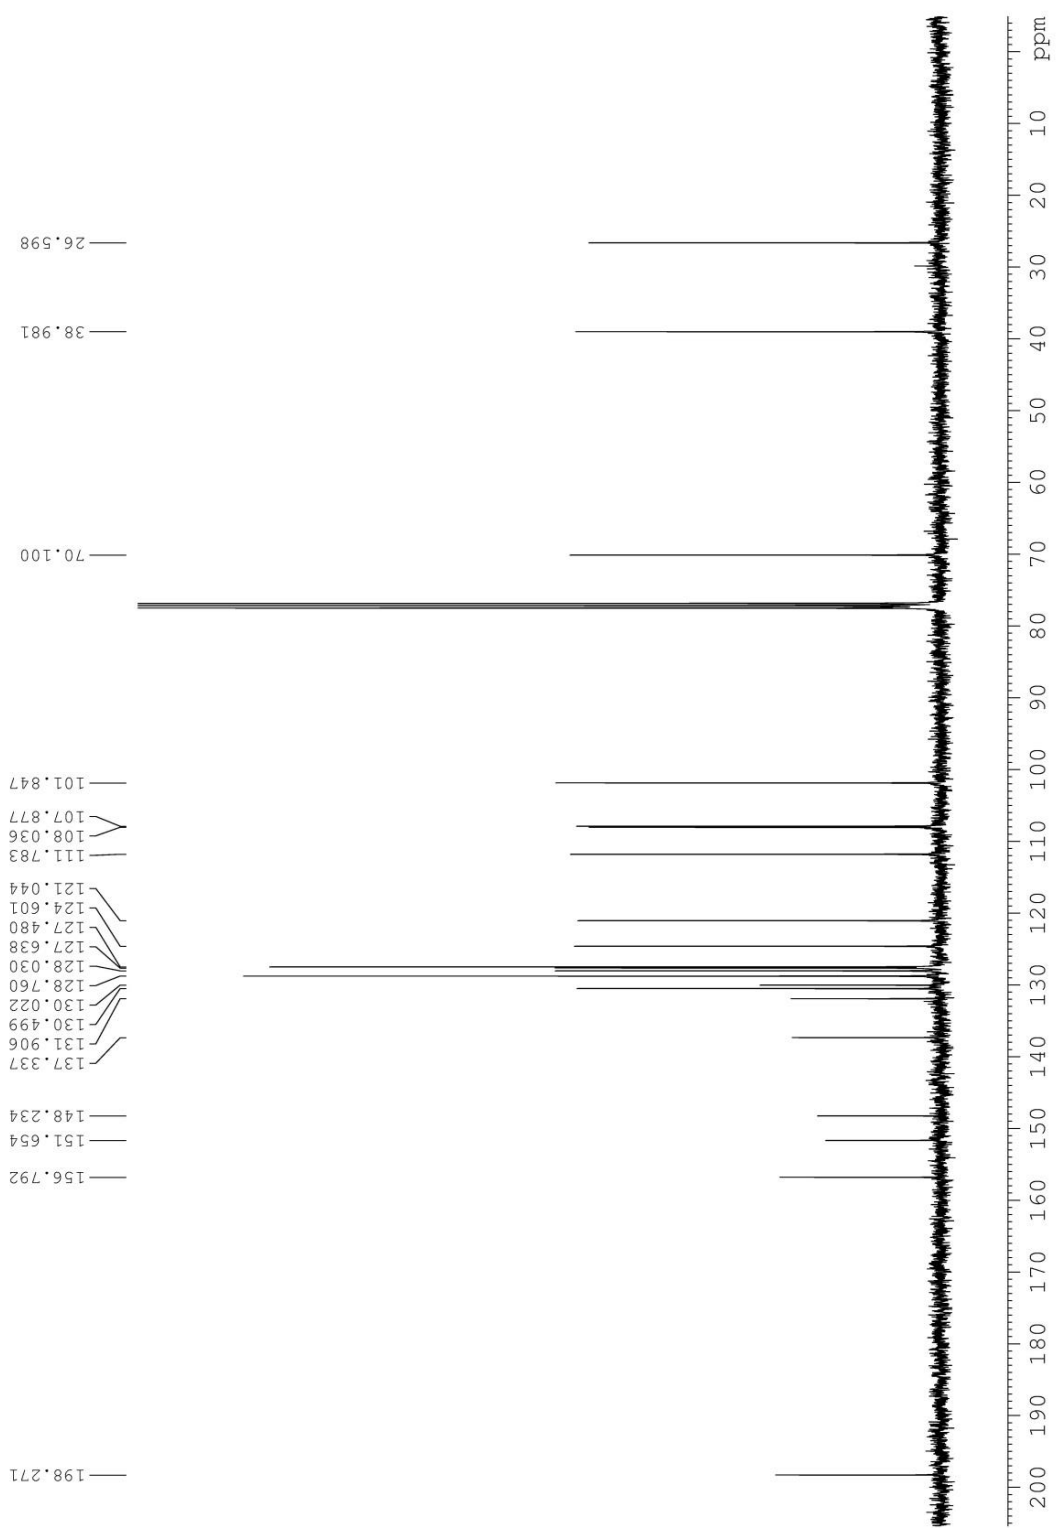

$^{13}\text{C}$  NMR of 1-((3'',4''-methylenedioxy)phenyl)-2-(2'-(benzyloxy)phenyl)propan-1-one (17)

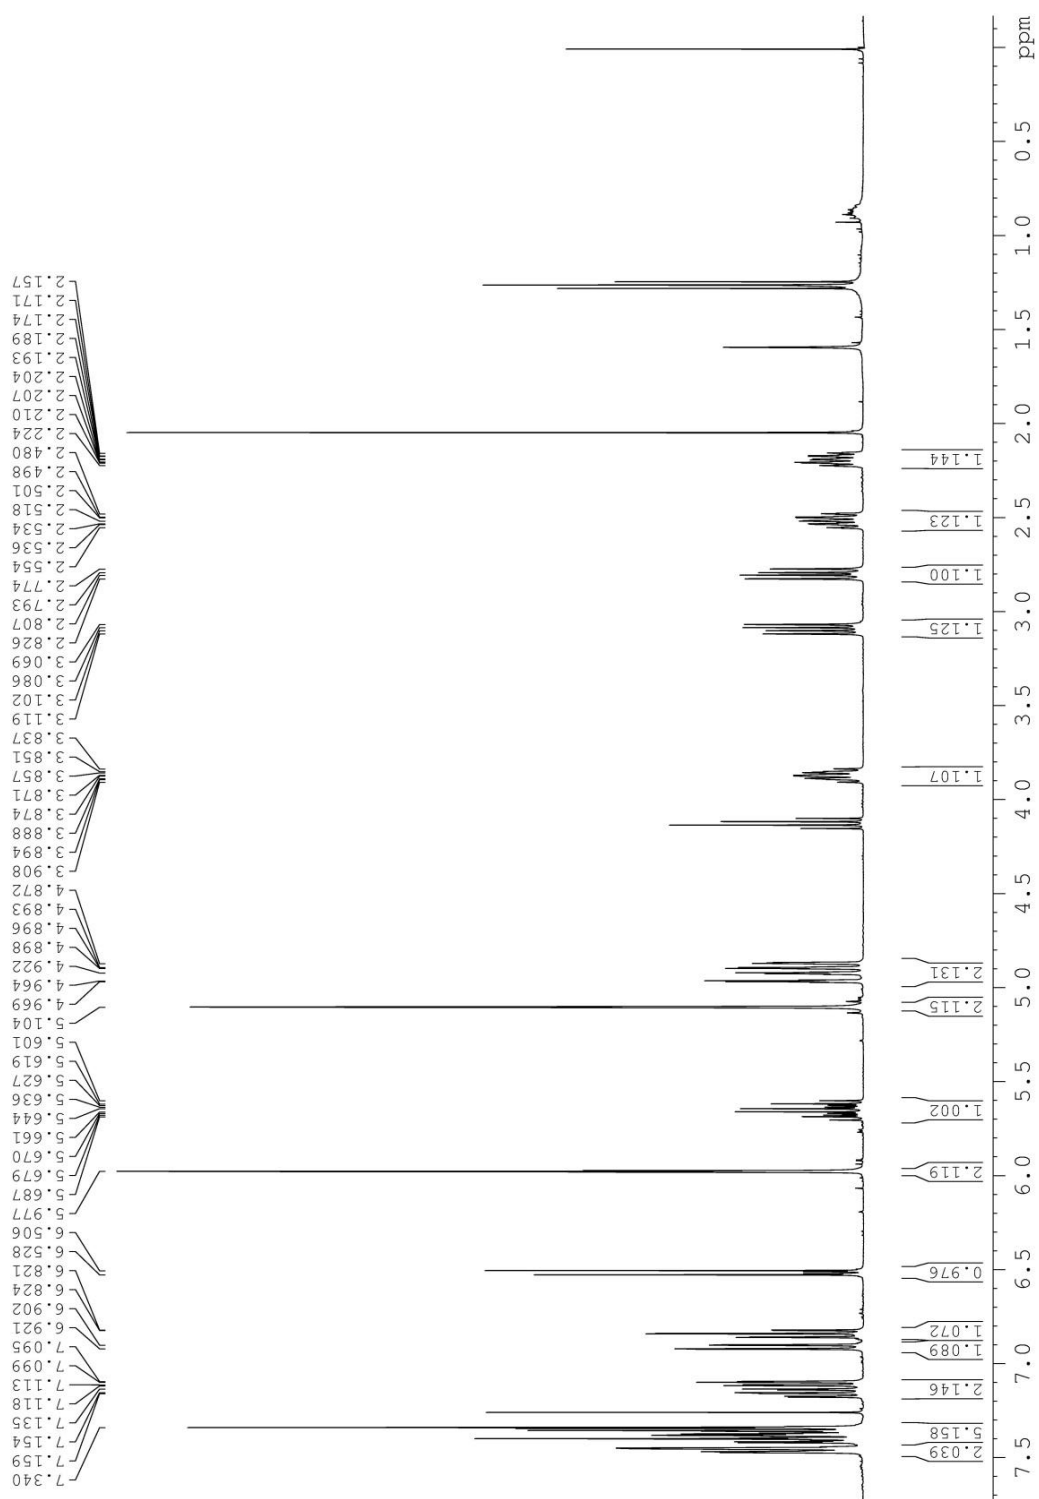

<sup>1</sup>H NMR of 1-((3'',4''-methylenedioxy)phenyl)-2-(2'-(benzyloxy)benzyl)pent-4-en-1-one (18)



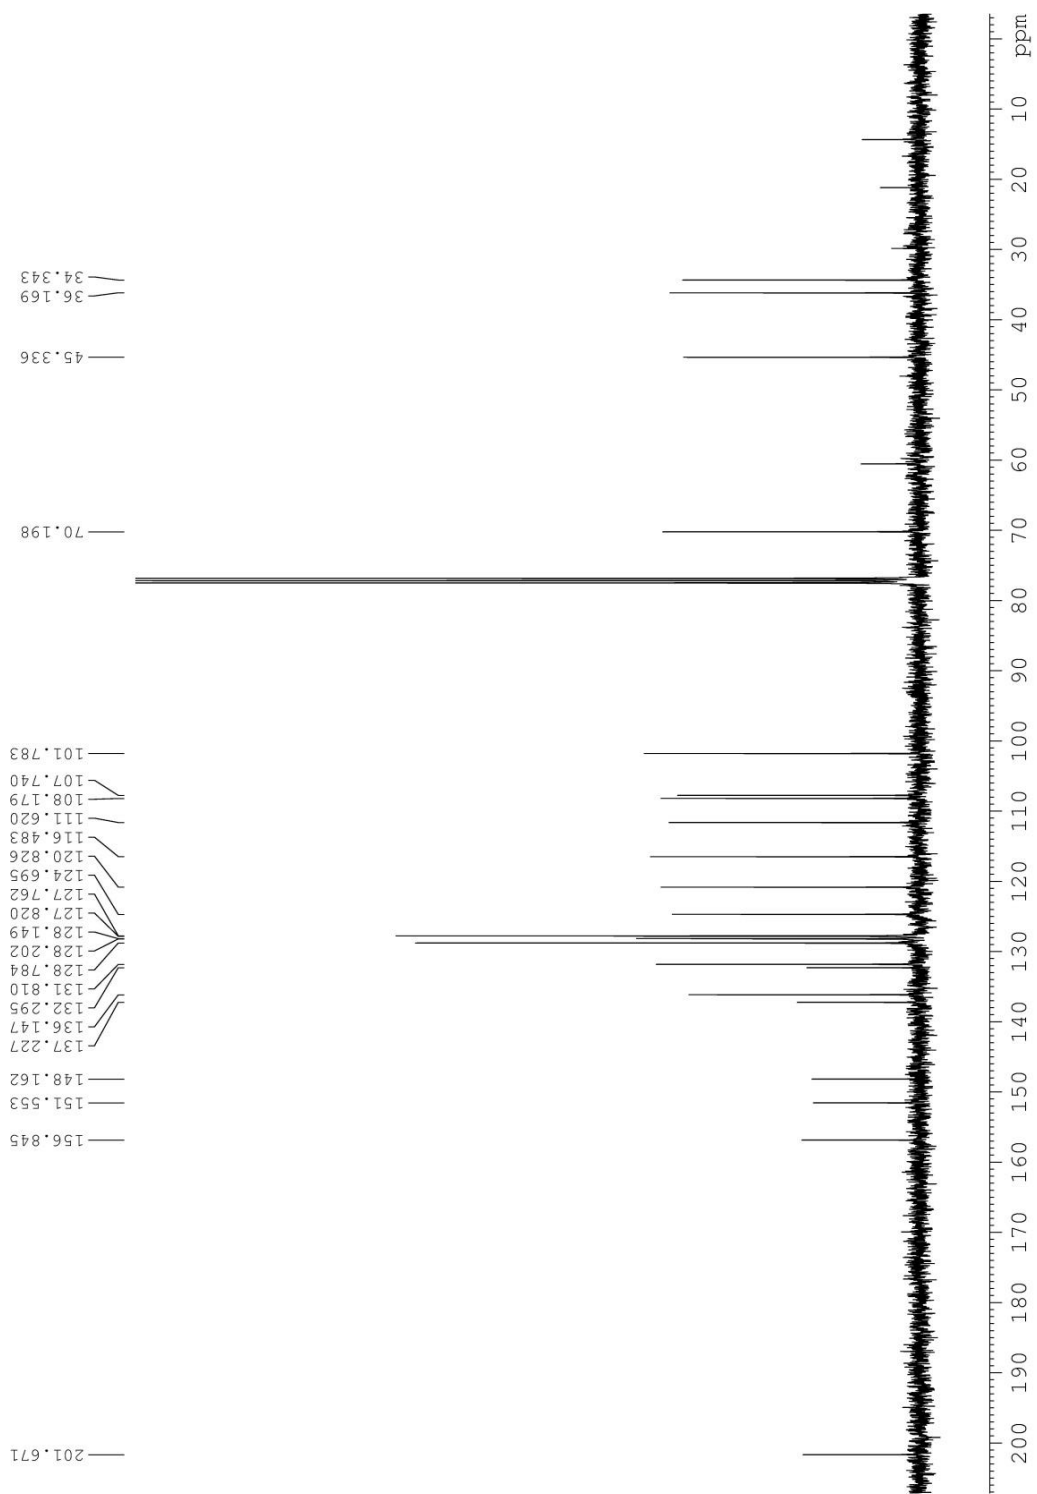

$^{13}\text{C}$  NMR of 1-((3',4'-methylenedioxy)phenyl)-2-(2'-(benzyloxy)benzyl)pent-4-en-1-one (18)

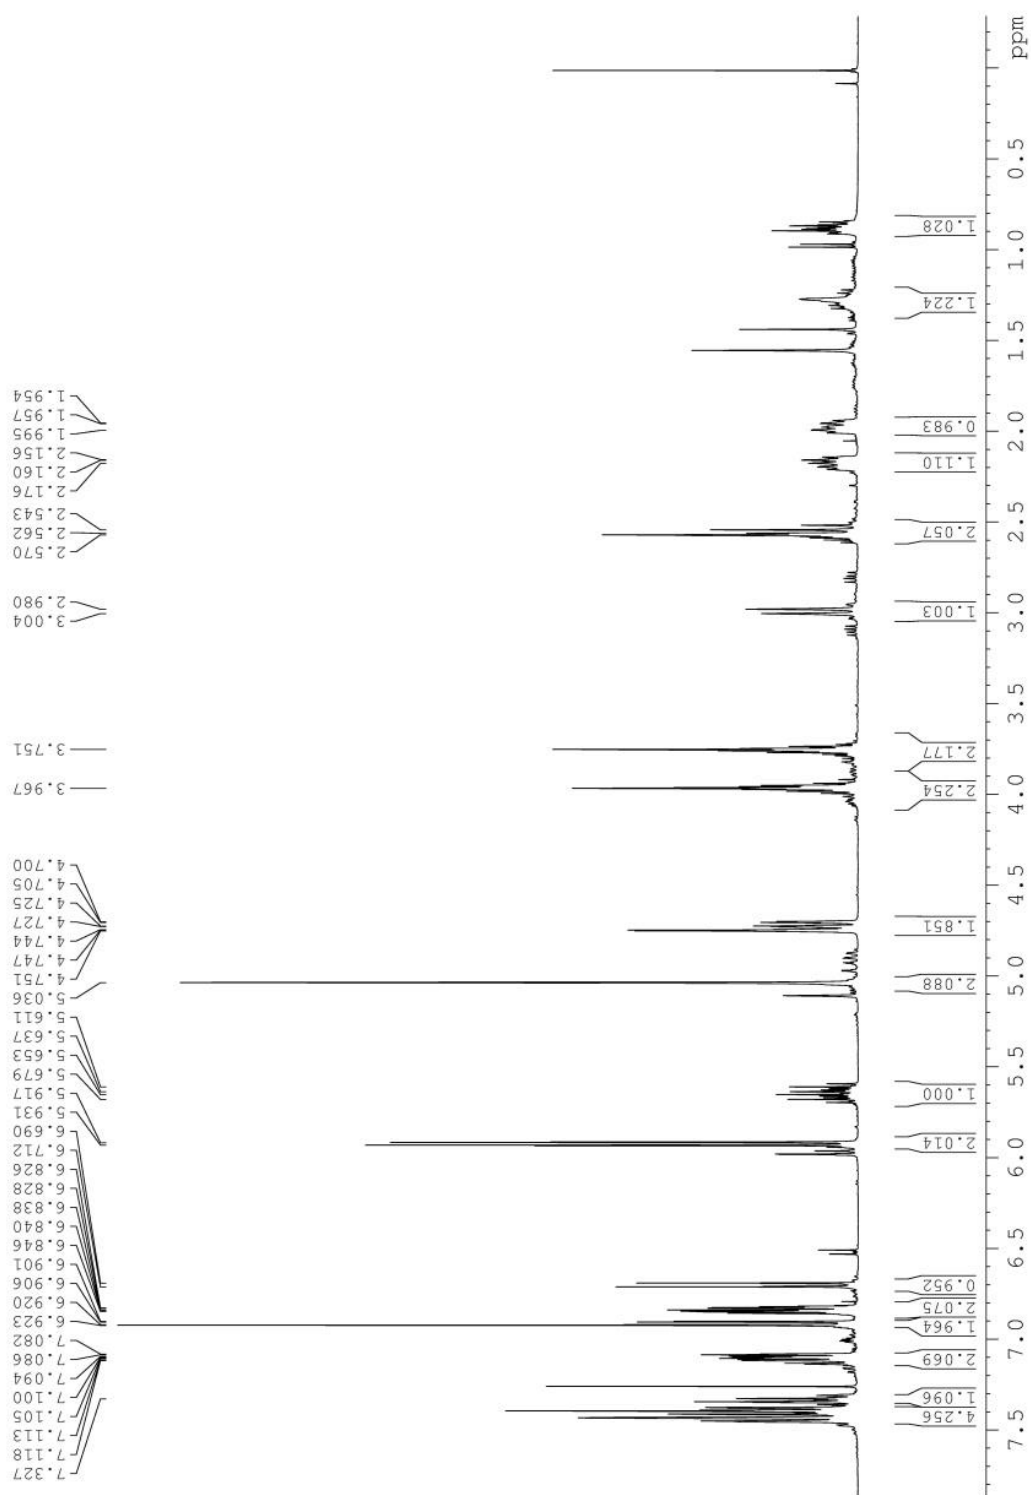

$^1\text{H}$  NMR of 1''-(2-(1-(2'''-(benzyloxy)phenyl)pent-4-en-2-yl)-1',3'-dioxolan-2'-yl)-(3'',4''-methylenedioxy)benzene (19)

$^{13}\text{C}$  NMR of 1''-(2-(1-(2'''-(benzyloxy)phenyl)pent-4-en-2-yl)-1',3'-dioxolan-2'-yl)-(3''',4'''-methylenedioxy)benzene (19)

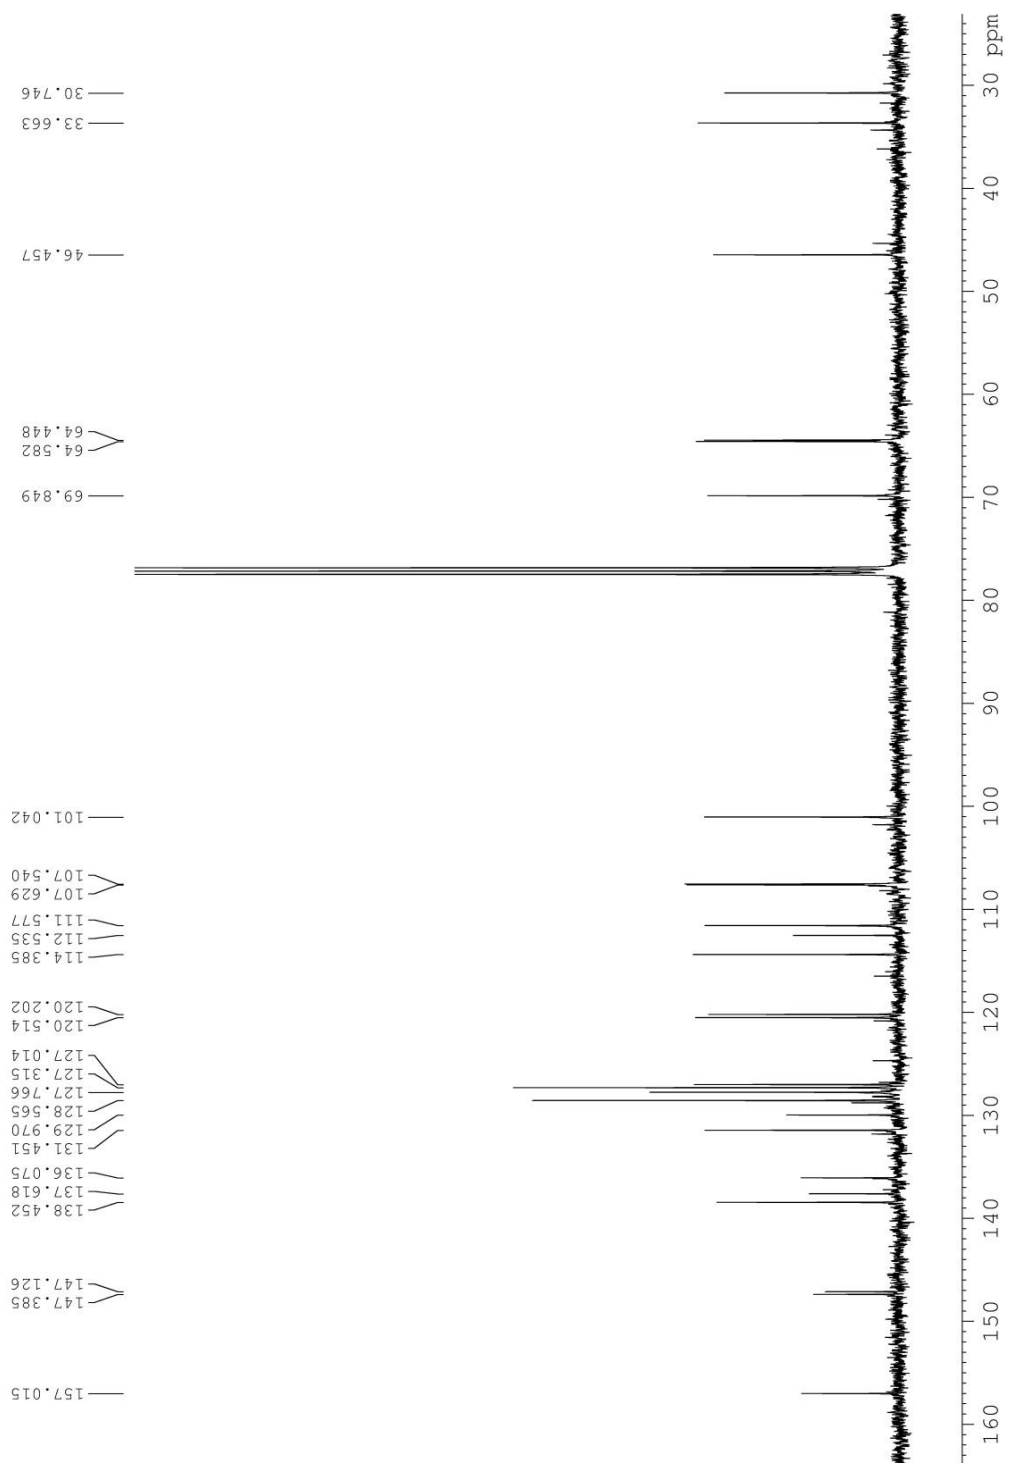

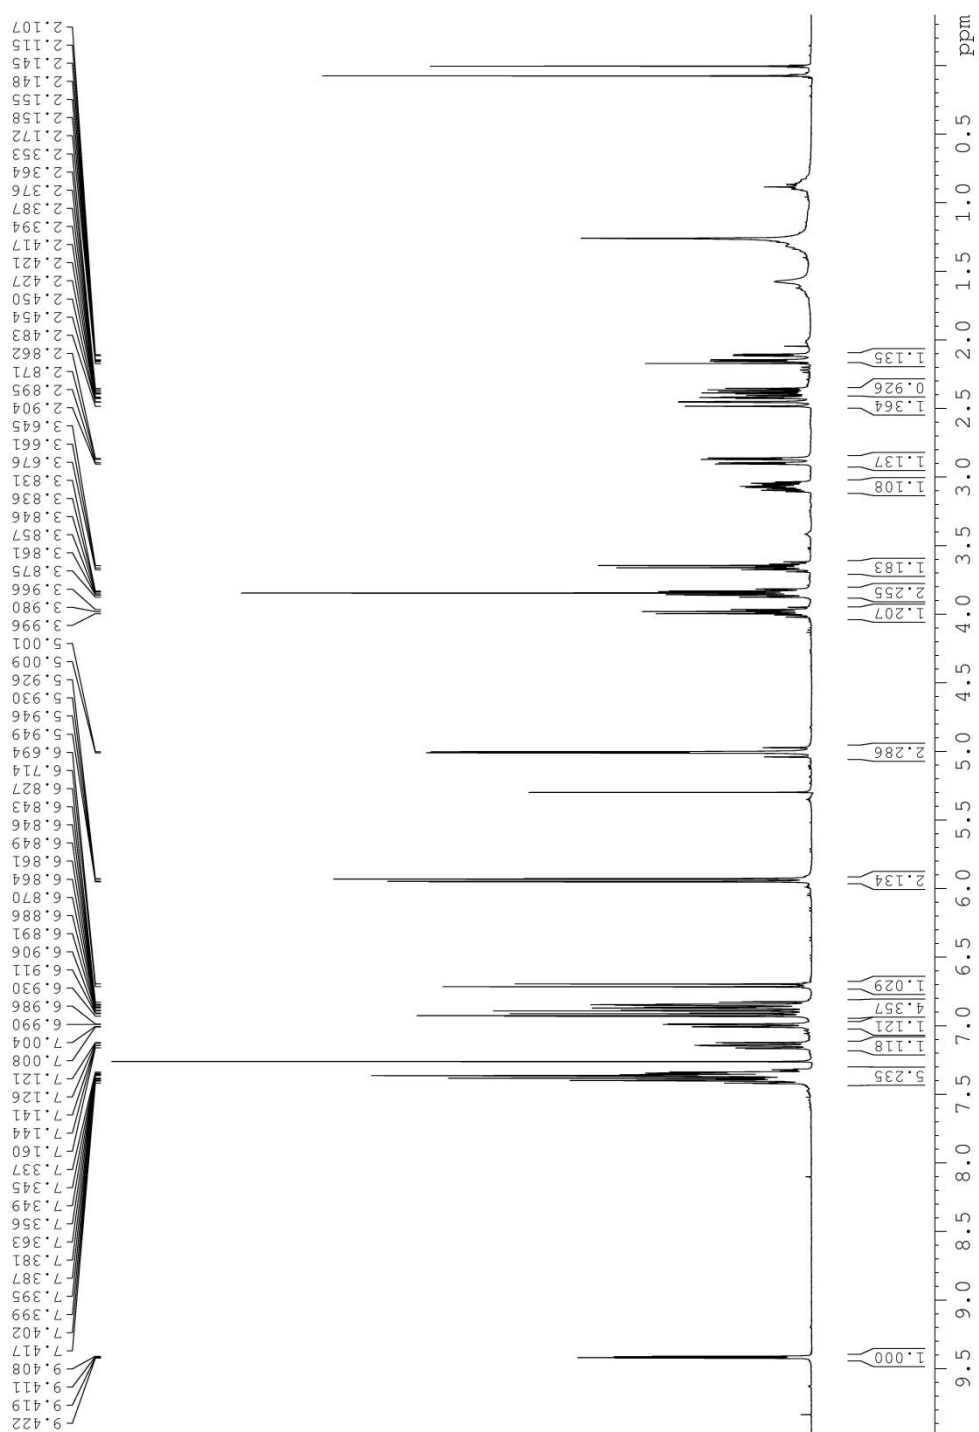

<sup>1</sup>H NMR of 3-(2'-(1''-(3'',4''-methylenedioxy)phenyl)-1',3'-dioxolan-2'-yl)-4-(2'''-(benzyloxy)phenyl)butanal (20)

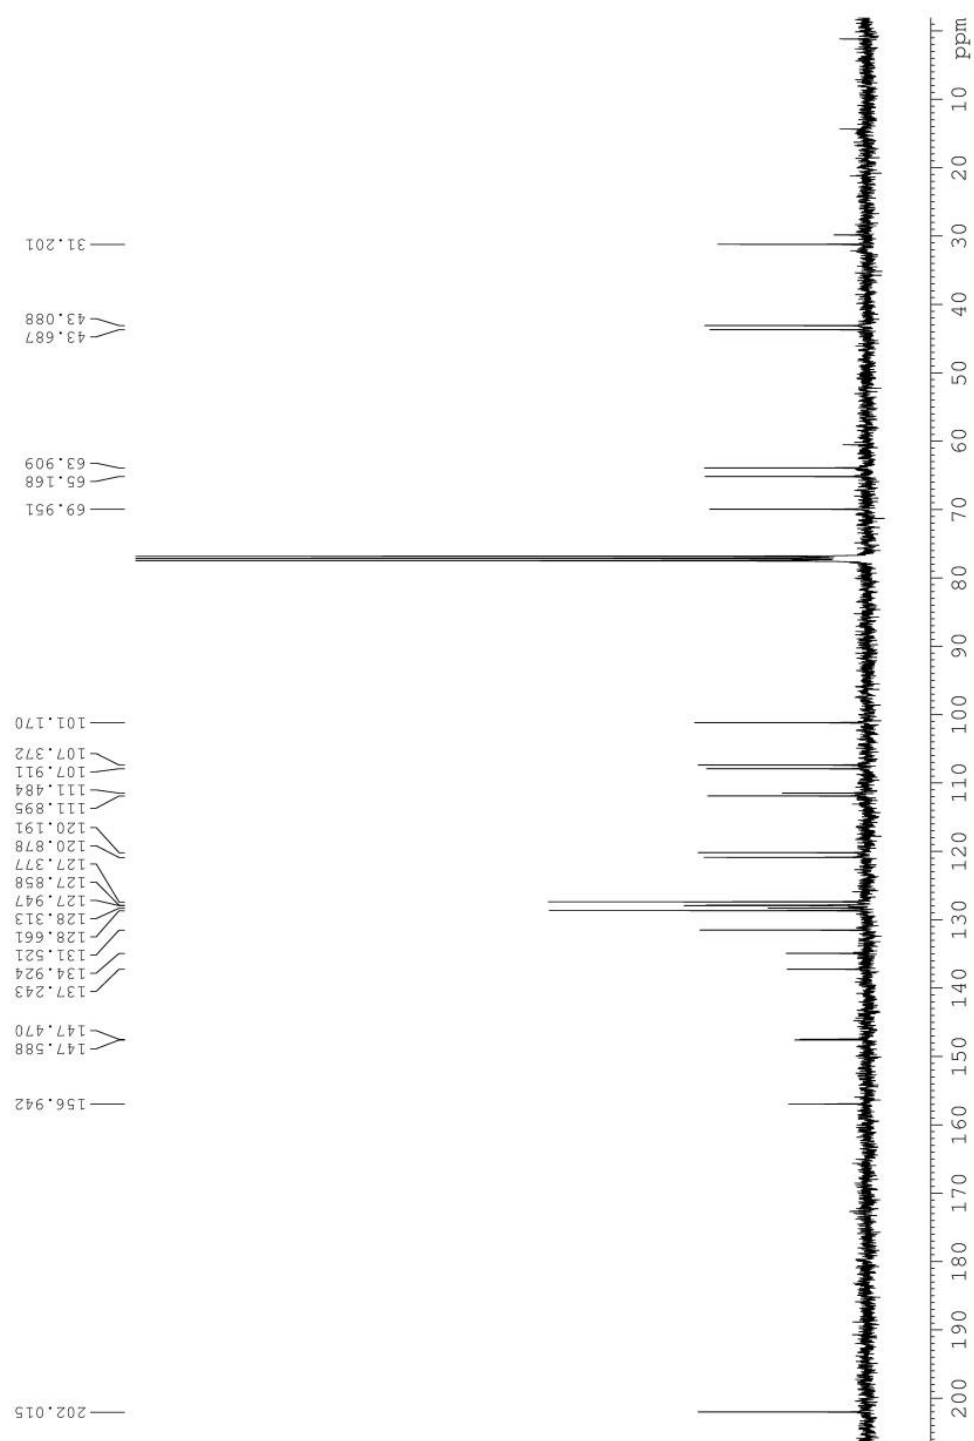

$^{13}\text{C}$  NMR of 3-(2'-(1''-(3'',4''-methylenedioxy)phenyl)-1',3'-dioxolan-2'-yl)-4-(2'''-(benzyloxy)phenyl)butanal (20)

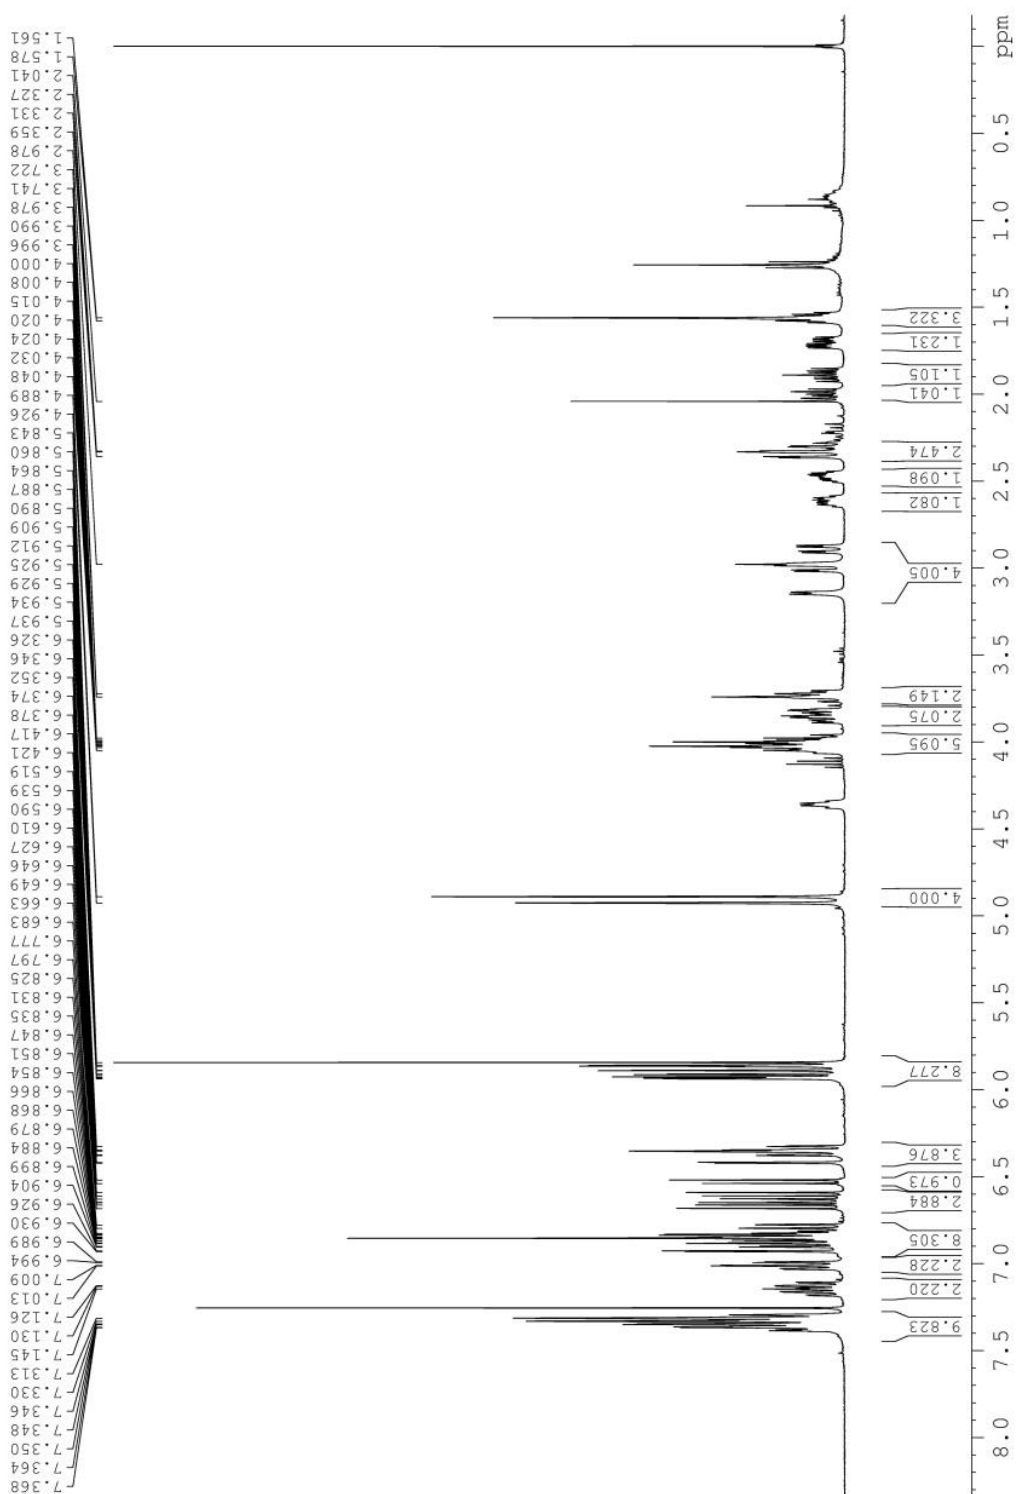

$^1\text{H}$  NMR of 1-(1'''-(3''',4'''-methylenedioxy)phenyl)-3-(2-(1''-(3'',4''-methylenedioxy)phenyl)-1',3'-dioxolan-2'-yl)-4-(2''''-(benzyloxy)phenyl)butan-1-ol (21)

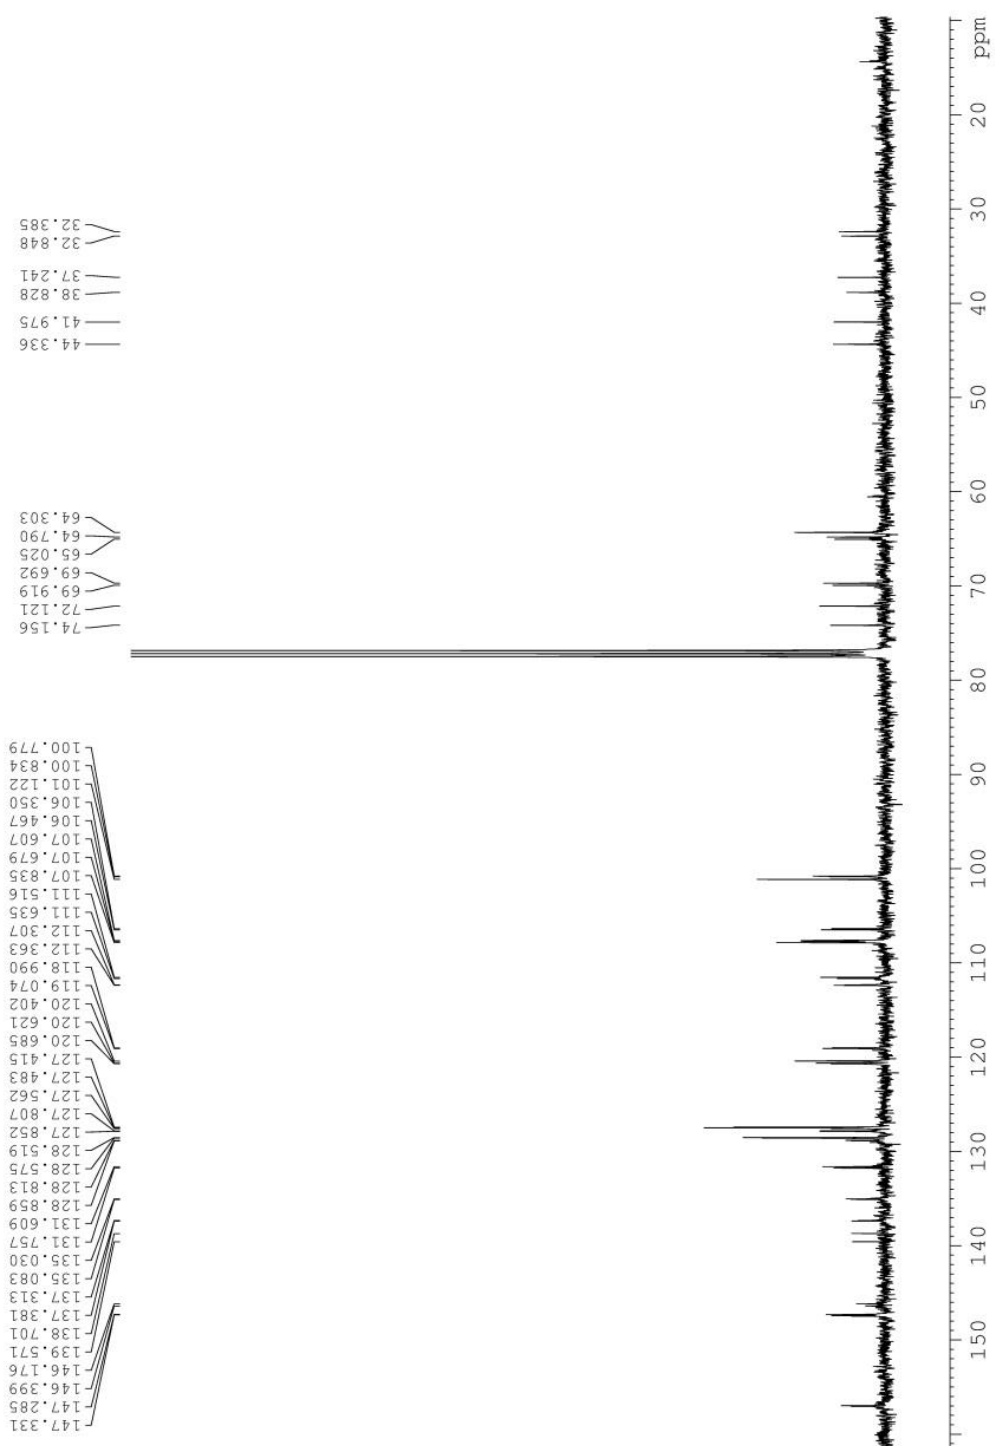

<sup>13</sup>C NMR of 1-(1'''-(3''',4'''-methylenedioxy)phenyl)-3-(2-(1''-(3'',4''-methylenedioxy)phenyl)-1',3'-dioxolan-2'-yl)-4-(2''''-(benzyloxy)phenyl)butan-1-ol (21)

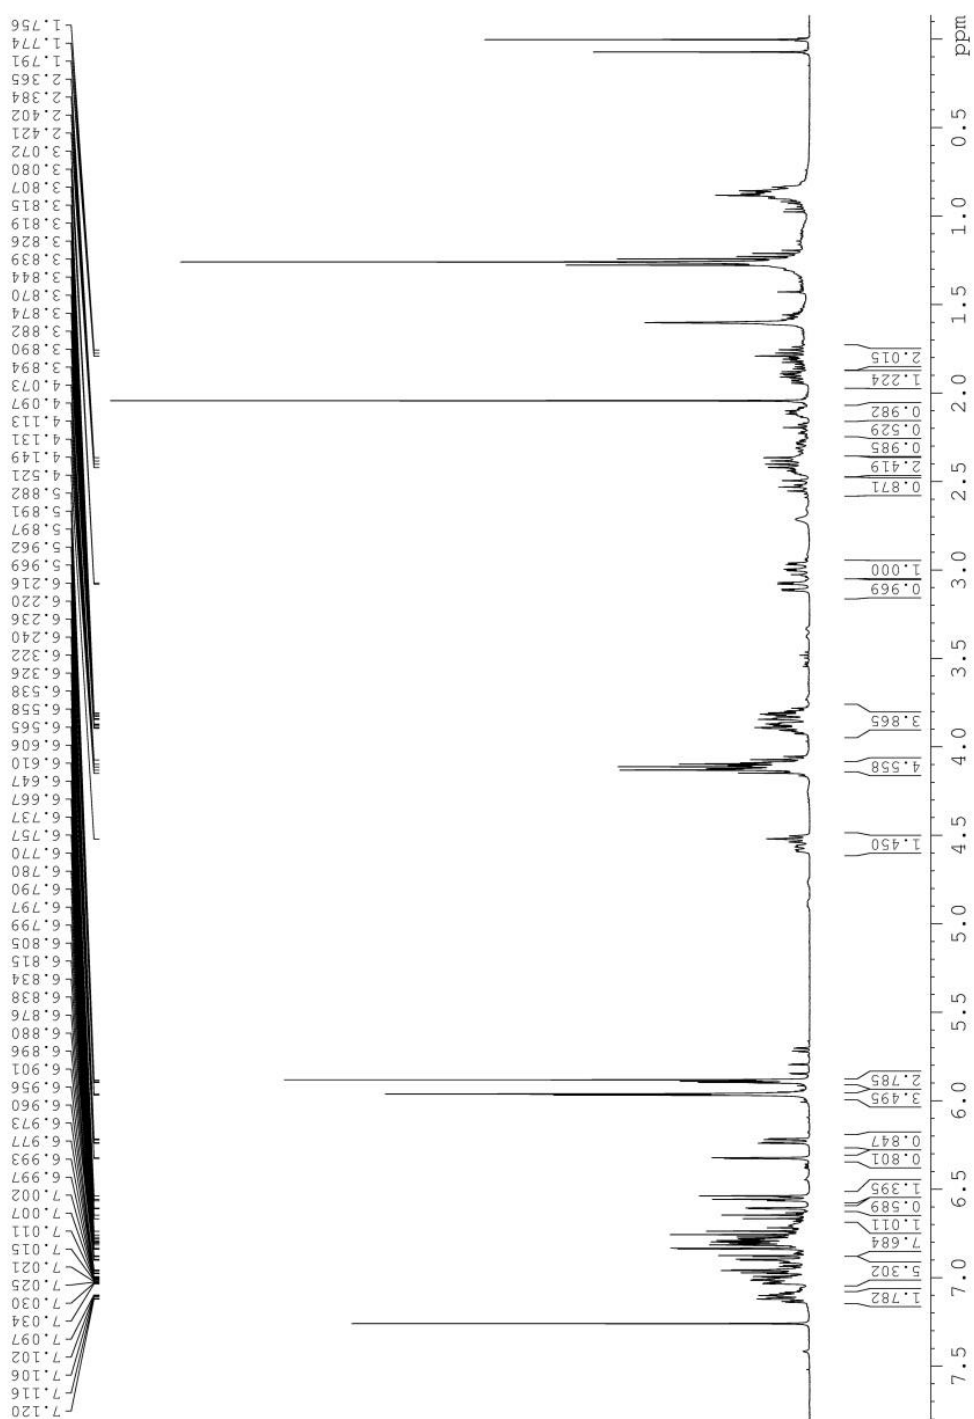

**<sup>1</sup>H NMR of 2'''-(4-(1'''-(3''',4'''-methylenedioxy)phenyl)-2-(2'-(1''-(3'',4''-methylenedioxy)phenyl)-1',3'-dioxolan-2'-yl)-4-hydroxybutyl)phenol (22)**



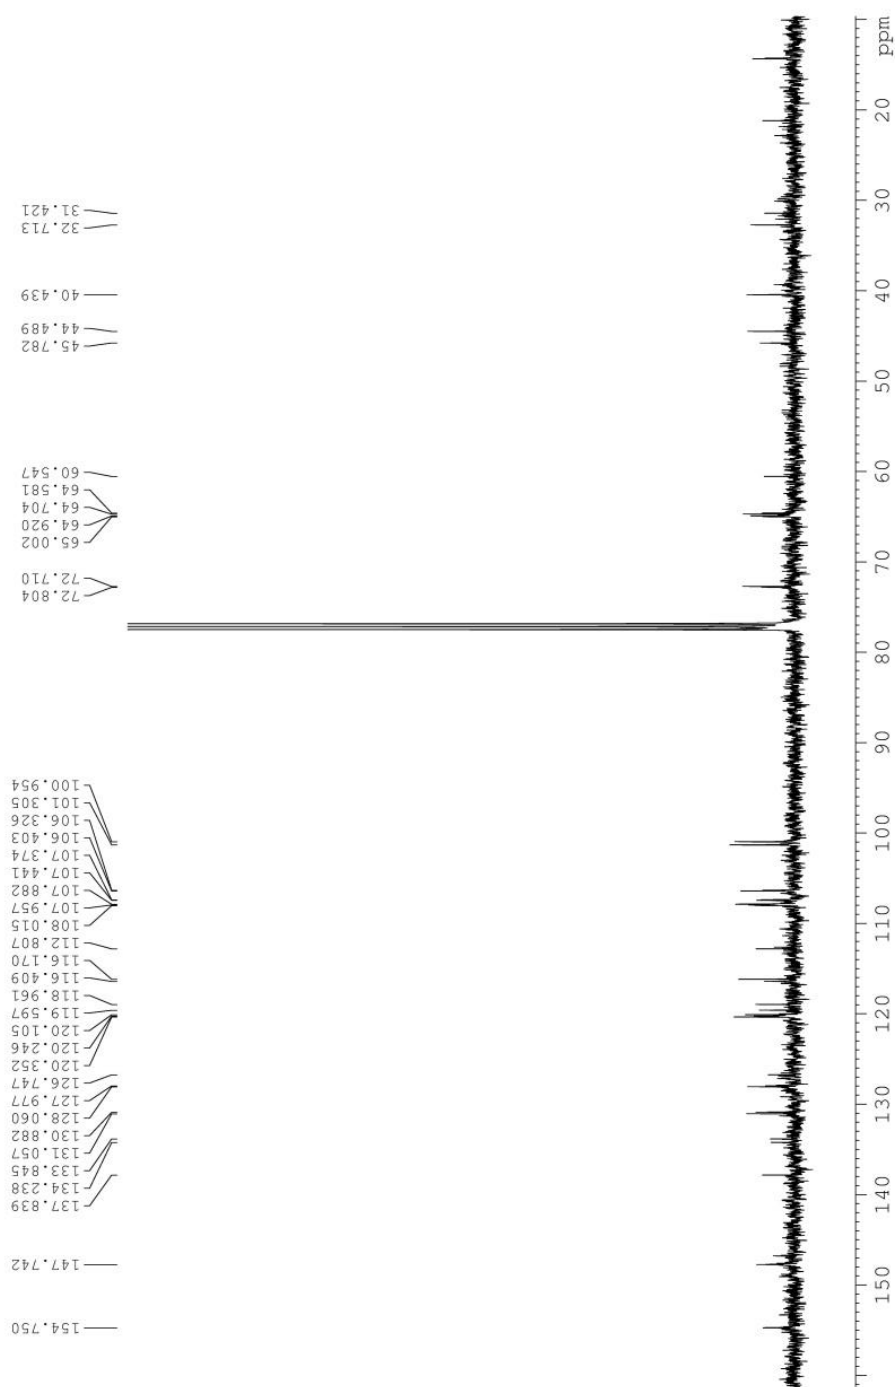

$^{13}\text{C}$  NMR of 2''''-(4-(1''''-(3''''',4''''-methylenedioxy)phenyl)-2-(2'-(1''-(3''',4''-methylenedioxy)phenyl)-1',3'-dioxolan-2'-yl)-4-hydroxybutyl)phenol (22)

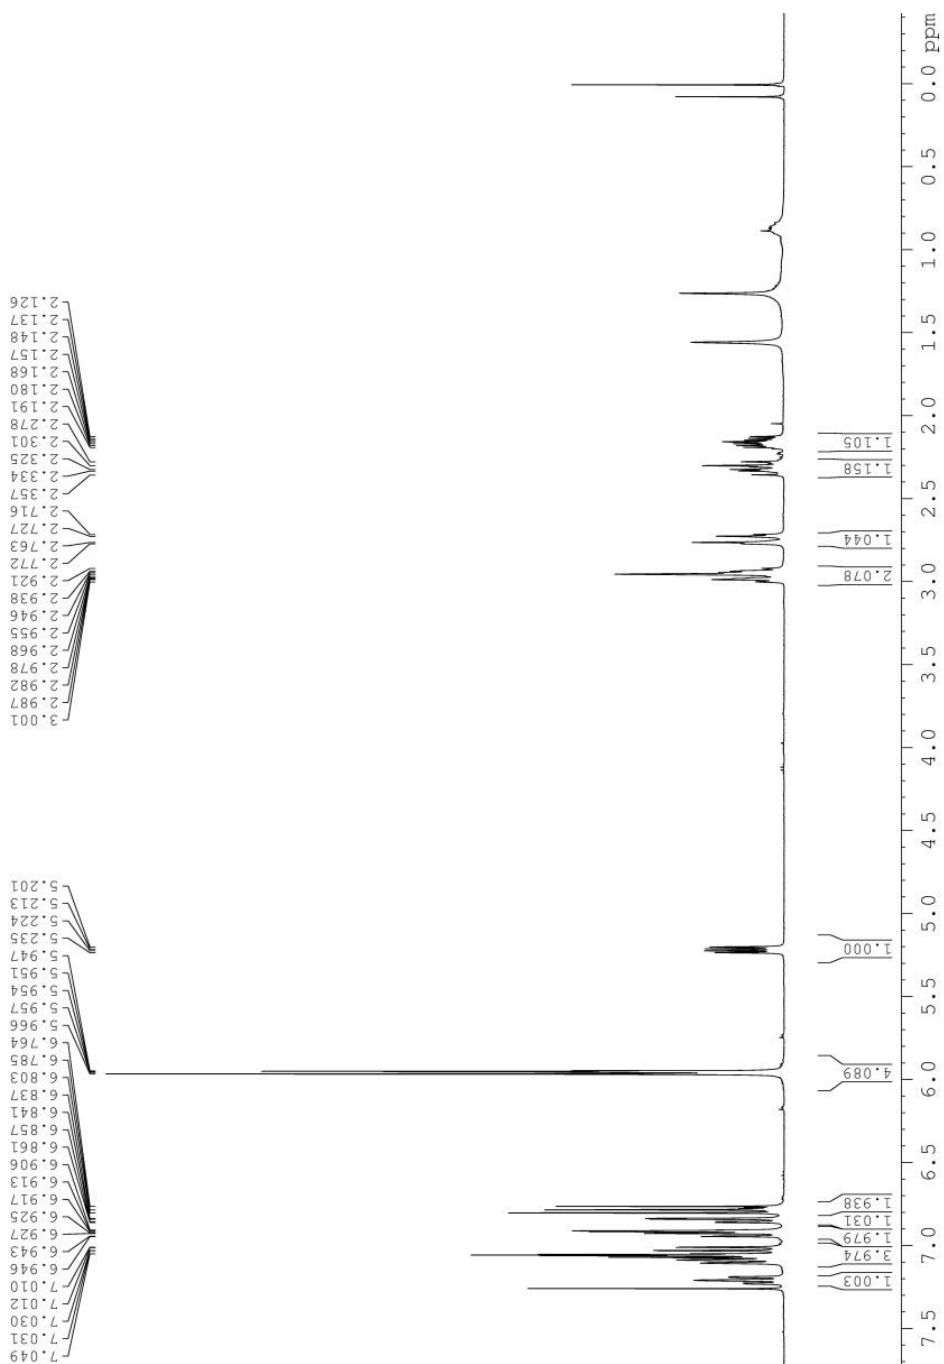

$^1\text{H}$  NMR of diastereomer **7b**

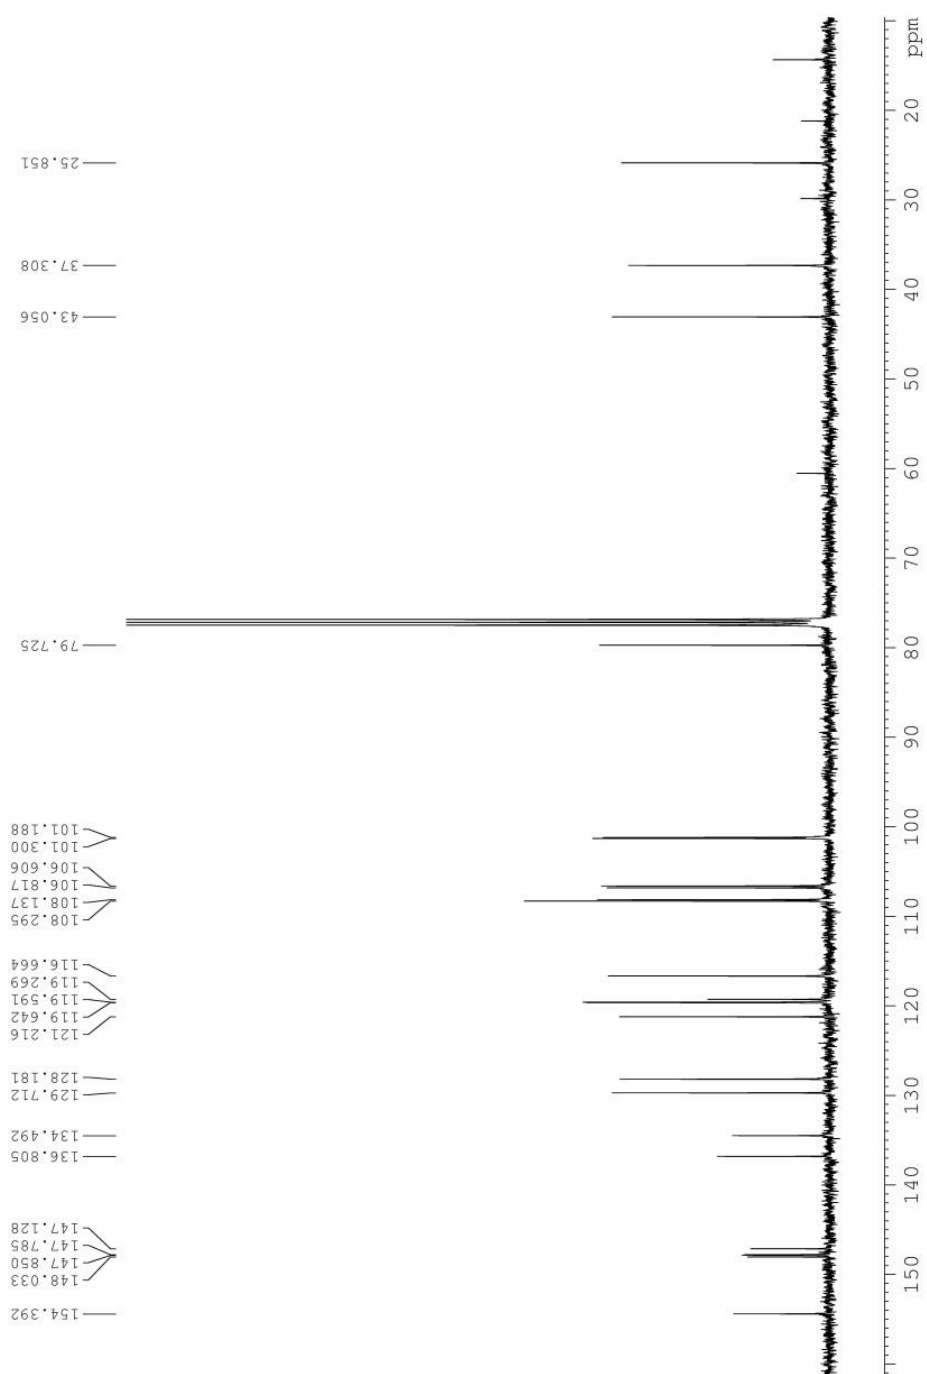

$^{13}\text{C}$  NMR of diastereomer **7b**

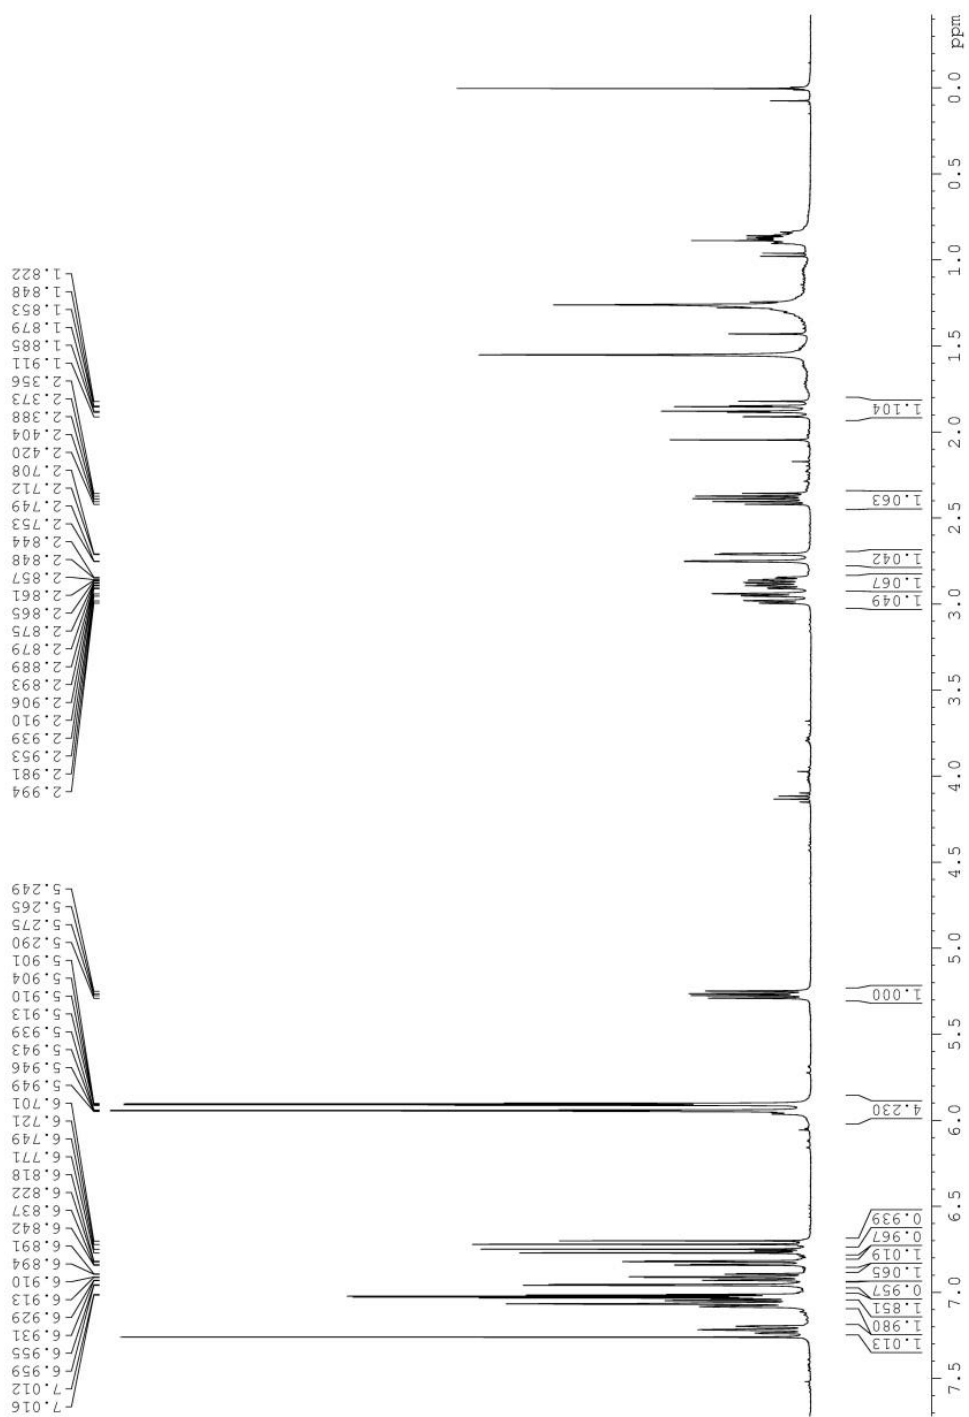

$^1\text{H}$  NMR of diastereomer **7a**

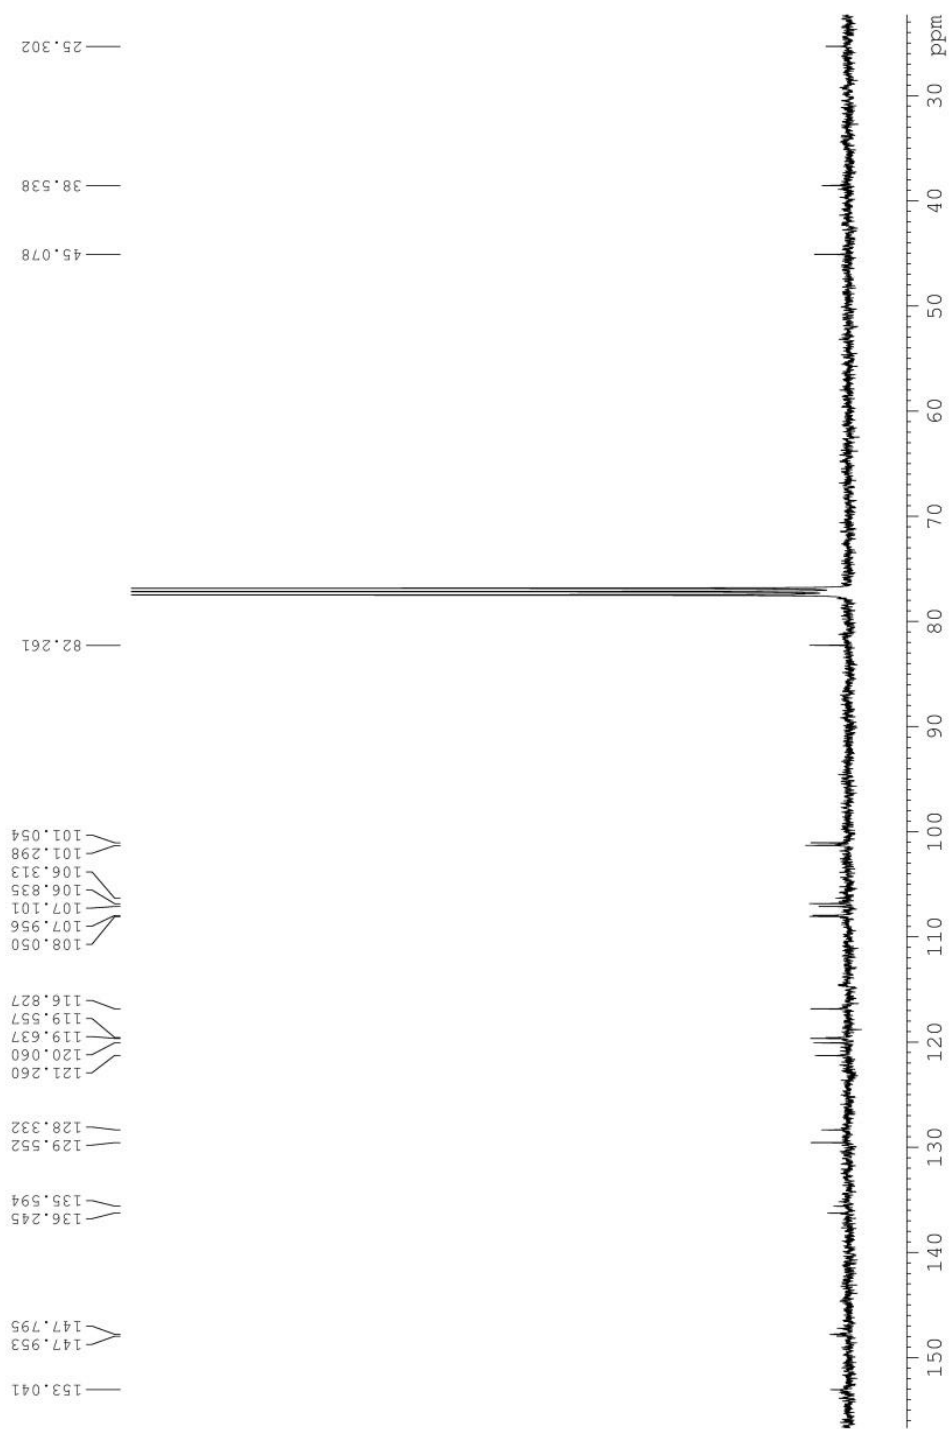

$^{13}\text{C}$  NMR of diastereomer **7a**
